# Supplementary material
Source: PubMed Central journal article supplement (PMC4485011)
Supplement: peds.2015-0368_peds.2015-0368SupplementaryData.pdf [file peds.2015-0368_peds.2015-0368SupplementaryData.pdf]

## Supplemental Information

**SUPPLEMENTAL TABLE 5** Outcomes of Vaginal Delivered Newborns

| VD Infant Outcomes                   | UCM, <i>N</i> = 23 | DCC, <i>N</i> = 20 | <i>P</i> |
|--------------------------------------|--------------------|--------------------|----------|
| Gestational age, wk                  | 28 ± 2             | 28 ± 3             | .22      |
| Birth wt, g                          | 1189 ± 326         | 1272 ± 430         | .47      |
| Birth Hb, g/dL                       | 16 ± 2             | 16 ± 1             | .8       |
| SVC flow, mL/kg per min              | 98 ± 32            | 75 ± 34            | .08      |
| RVO, mL/kg per min                   | 245 ± 54           | 205 ± 65           | .09      |
| Urine output first 24 h, mL/kg per h | 4 ± 1.7            | 3.7 ± 1            | .59      |
| Any IVH, no. (%)                     | 4 (17)             | 7 (35)             | .50      |
| Severe IVH, no. (%)                  | 0                  | 2 (10)             | .49      |

PPV, positive-pressure ventilation.
